# Supplementary material for: Characterization of Essential Oils from Different Taxa Belonging to the Genus Teucrium in Sardinia Island, Italy
Source: MDPI journal article supplement (doi:10.3390/plants10071359), 2021-07-02
Supplement: s1 [file s1]

**Table S1.** List of Sardinian *Teucrium* taxa selected for this study

| Taxon                                                                           | Label | Voucher specimen | Collection sites                          | GPS coordinates                | Information on collection sites                                                                                                                                                                                                                                                                                                                                                   |
|---------------------------------------------------------------------------------|-------|------------------|-------------------------------------------|--------------------------------|-----------------------------------------------------------------------------------------------------------------------------------------------------------------------------------------------------------------------------------------------------------------------------------------------------------------------------------------------------------------------------------|
| <i>Teucrium capitatum</i> L.<br>subsp. <i>capitatum</i>                         | Tcsc  | CAG 1123a        | Su Crastu biancu -<br>San Vero Milis (OR) | 40° 2'48.97"N<br>8°25'51.09"E  | (1) June; (2) sandstone; (3) 179.10 m; (4) 10 m a.s.l; (5) coastal garrigue; (6) 23 °C and 10 mm; (7) upper thermomediterranean, lower dry, euoceanic strong; (8) Sardinian, thermomediterranean psammophilous micro-geoseries of coastal dunes ( <i>Cakiletea</i> , <i>Ammophiletea</i> , <i>Crucianellion maritima</i> , <i>Malcolmietalia</i> , <i>Juniperion turbinatae</i> ) |
| <i>Teucrium chamaedrys</i><br>L. subsp. <i>chamaedrys</i>                       | Tcha  | CAG 1119a        | Pauli longa - Laconi<br>(OR)              | 39°51'42.31" N<br>9° 8'24.87"E | (1) June; (2) dark carbonaceous metapelites; (3) 42644.42 m; (4) 803 m a.s.l; (5) wetland; (6) 20 °C and 50 mm; (7) upper mesomediterranean, lower subhumid, euoceanic weak; (8) central Sardinian, silicicolous, meso-supratemperate series of <i>Loncomelo pyrenaici-Quercetum ichnusae</i>                                                                                     |
| <i>Teucrium flavum</i> L.<br>subsp. <i>glaucum</i> (Jord.<br>& Fourr.) Ronniger | Tfsg  | CAG 1117a        | Nulvi (SS)                                | 40°46'41.51"N<br>8°44'20.02"E  | (1) July; (2) sandstone; (3) 12719.11 m; (4) 513 m a.s.l; (5) garrigue; (6) 22 °C and 20 mm; (7) lower mesomediterranean, lower subhumid, euoceanic weak; (8) central-western Sardinian, silicicolous, mesomediterranean series of <i>Violo dehnhardtii-Quercetum suberis</i>                                                                                                     |
| <i>Teucrium marum</i> L.                                                        | Tmar  | CAG 1115a        | Calamosca -<br>Cagliari (CA)              | 39°11'5.32"N<br>9° 8'54.79"E   | (1) July; (2) sandstone; (3) 130.50 m; (4) 25 m a.s.l; (5) costal garrigue; (6) 24 °C and 10 mm; (7) lower thermomediterranean, lower dry, euoceanic strong; (8) Sardinian thermomediterranean series of <i>Oleo-Juniperetum turbinatae</i>                                                                                                                                       |
| <i>Teucrium massiliense</i><br>L.                                               | Tmas  | CAG 1122a        | Loc. Bardacolo -<br>Sorgono (NU)          | 40° 1'52.21"N<br>9° 3'56.66"E  | (1) June; (2) tonalites; (3) 55326.74 m; (4) 770 m a.s.l; (5) forest; (6) 20 °C and 20 mm; (7) upper mesomediterranean, upper subhumid, semicontinental weak; (8) Sardinian, silicicolous, thermo-mesomediterranean series of <i>Galio scabri-Quercetum suberis</i>                                                                                                               |
| <i>Teucrium scordium</i><br>subsp. <i>scordioides</i><br>(Schreb.) Arcang.      | Tsss  | CAG 1120a        | Pauli longa - Laconi<br>(OR)              | 39°51'42.31" N<br>9° 8'24.87"E | (1) June; (2) dark carbonaceous metapelites; (3) 42644.42 m; (4) 803 m a.s.l; (5) wetland; (6) 20 °C and 50 mm; (7) upper mesomediterranean, lower subhumid, euoceanic weak; (8) central Sardinian, silicicolous, meso-supratemperate series of <i>Loncomelo pyrenaici-Quercetum ichnusae</i>                                                                                     |

|                                                 |      |           |                                       |                               |                                                                                                                                                                                                                                                                                    |
|-------------------------------------------------|------|-----------|---------------------------------------|-------------------------------|------------------------------------------------------------------------------------------------------------------------------------------------------------------------------------------------------------------------------------------------------------------------------------|
| <i>Teucrium scorodonia</i> L.                   | Tsco | CAG 1118a | Monte Sant' Antonio<br>- Macomer (NU) | 40°14'11.01"N<br>8°40'55.13"E | (1) June; (2) basalt; (3) 18550.93 m; (4) 750 m a.s.l; (5) forest fringes; (6) 19 °C and 20 mm; (7) upper mesomediterranean, upper subhumid, euoceanic weak; (8) central Sardinian, silicicolous, meso-supratemperate series of <i>Loncomelo pyrenaici-Quercetum ichnusae</i>      |
| <i>Teucrium subspinosum</i><br>Pourr. ex Willd. | Tsub | CAG III4a | Marganai Mountain<br>- Iglesias (SU)  | 39°20'56.20"N<br>8°34'26.74"E | (1) July; (2) limestone; (3) 10809.04 m; (4) 489 m a.s.l; (5) forest; (6) 22 °C and 10 mm; (7) upper mesomediterranean, upper subhumid, euoceanic weak; (8) central-southern Sardinian, calcicolous, meso-supramediterranean series of <i>Aceri monspessulani-Quercetum ilicis</i> |

In the last column the following information has been reported: (1) Collection period of plant materials; (2) substratum of collection sites; (3) distance from the sea; (4) altitude; (5) type of habitat; (6) medium temperature and precipitation of the month of collection; (7) bioclimate - isobioclimates; (8) vegetation and vegetation series
